# Supplementary material for: X-Ray crystallographic signature of supramolecular triple helix formation from a water soluble synthetic tetrapeptide
Source: Royal Society of Chemistry journal article supplement (doi:10.1039/b417726f), 2005-01-01
Supplement: b417726f.pdf [file b417726f.pdf]

## **Supplementary Information**

### **X-Ray crystallographic signature of supramolecular triple helix formation from a water soluble synthetic tetrapeptide**

Apurba Kumar Das,<sup>a</sup> Debasish Halder,<sup>a</sup> Raghurama P. Hegde,<sup>b</sup> N.

Shamala\*<sup>b</sup> and Arindam Banerjee\*<sup>a</sup>

<sup>a</sup> Department of Biological Chemistry, Indian Association for the Cultivation of Science, Jadavpur, Kolkata-700032, India E-mail: [bcab@mahendra.iacs.res.in](mailto:bcab@mahendra.iacs.res.in)

<sup>b</sup> Department of Physics, Indian Institute of Science, Bangalore-560 012, India E-mail [shamala@physics.iisc.ernet.in](mailto:shamala@physics.iisc.ernet.in)

#### Table of Contents

| Category          | Page No. |
|-------------------|----------|
| Figure S1         | S2       |
| Peptide Synthesis | S3       |
| Figure S2         | S4       |
| Figure S3         | S5       |
| Table S1          | S6       |
| Table S2          | S8       |
| Table S3          | S10      |

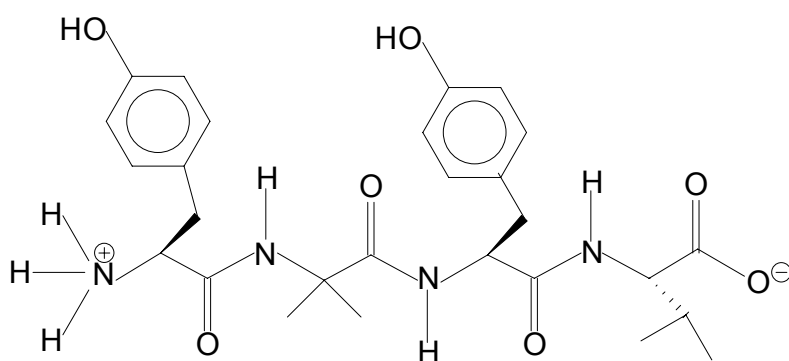

Figure S1: Chemical structure of peptide 1

**Peptide synthesis:** The tetrapeptide was synthesized by conventional solution phase methods using racemization free fragment condensation strategy. The Boc group was used for N-terminal protection and the C-terminus was protected as a methyl ester. Couplings were mediated by dicyclohexylcarbodiimide-1-hydroxybenzotriazole (DCC/HOBt). All intermediates have been characterized by <sup>1</sup>H-NMR (300MHz) and thin layer chromatography (TLC) on silica gel and used without further purification. Deprotection of methyl ester was performed using saponification method and the Boc group was deprotected by TFA. The final products were purified by column chromatography using silica (100-200 mesh size) gel as stationary phase and chloroform-methanol (6:4) as eluent. Purified final compounds have been fully characterized by 300 MHz <sup>1</sup>H -NMR spectroscopy, Mass spectrometry. Crystals suitable for an X-ray diffraction study was obtained from water-methanol solution by slow evaporation.

<sup>1</sup>H NMR (300 MHz, DMSO-d<sub>6</sub>) δ 9.12 (br, 3H), 8.25 (s, 1H), 7.65 (d, *J* = 8.3 Hz, 1H), 7.58 (d, *J* = 8.3 Hz, 1H), 7.03 (d, *J* = 8.3 Hz, 2H), 6.98 (d, *J* = 8.3 Hz, 2H), 6.67 (d, *J* = 8.3 Hz, 2H), 6.60 (d, *J* = 8.4 Hz, 2H), 4.42-4.50 (m, 1H), 3.95-3.99 (m, 1H), 3.53 (m, 1H), 2.86-3.07 (m, 2H), 2.57-2.72 (m, 2H), 2.00-2.07 (m, 1H), 1.18 (d, *J* = 10.5 Hz, 6H), 0.81-0.89 (m, 6H).

IR (KBr)  $\gamma_{\max}$  3536, 3493, 3289, 1658, 1547, 1515 cm<sup>-1</sup>

Mass spectral data (ESI-MS) *m/z* = 529.3 [M+H]<sup>+</sup>, *M*<sub>calcd</sub> = 528.

Anal.Calcd. for C<sub>27</sub>H<sub>36</sub>N<sub>4</sub>O<sub>7</sub> (528): C,61.36; H,6.81 ; N,10.61

Found: C, 61.28; H, 6.80; N, 10.59

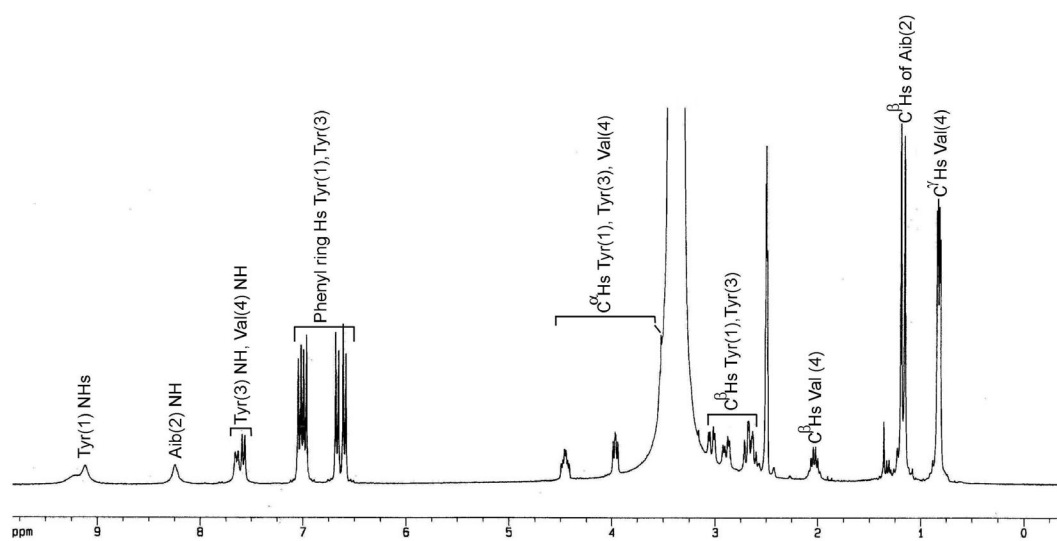

Figure S2: 300 MHz  $^1\text{H}$  NMR spectrum of peptide 1 in  $\text{DMSO-d}_6$ .

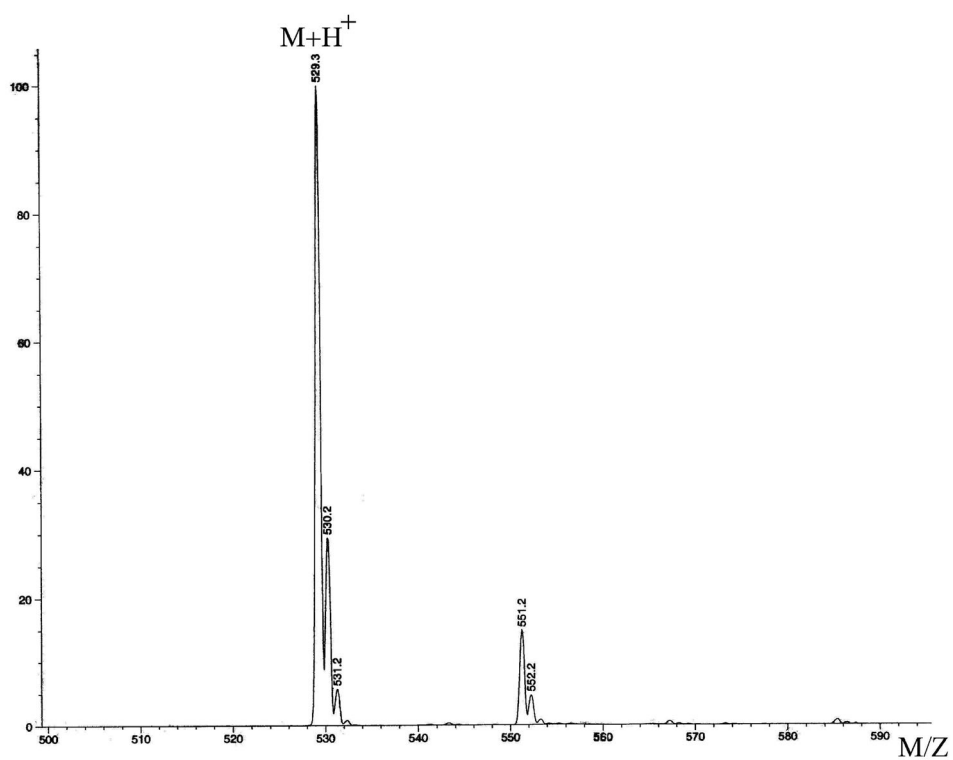

Figure S3: Typical Mass spectrum (ESI-MS) of peptide 1.

Table S1: Final Coordinates ( $\text{\AA} \times 10^4$ ) and Equivalent Isotropic Displacement Parameters ( $\text{\AA}^2 \times 10^3$ ) of the non-Hydrogen atoms for peptide **1**

| Atom | x          | y           | z           | U(eq) [Ang <sup>2</sup> ] |
|------|------------|-------------|-------------|---------------------------|
| O1   | -0.0521(6) | 0.2484(6)   | 0.11438(8)  | 0.0766(16)                |
| O1N  | 0.1882(9)  | 0.0964(7)   | 0.00985(8)  | 0.100(2)                  |
| O2   | 0.2139(7)  | 0.7339(6)   | 0.11350(7)  | 0.0722(16)                |
| O3   | 0.6062(5)  | 0.9073(5)   | 0.13473(7)  | 0.0668(14)                |
| O3N  | 0.3553(7)  | 0.7842(7)   | 0.24803(7)  | 0.0871(16)                |
| O4   | 0.2680(5)  | 1.1625(5)   | 0.14990(6)  | 0.0632(12)                |
| O5   | 0.4908(6)  | 1.3701(5)   | 0.13222(7)  | 0.0703(14)                |
| N1   | -0.0469(6) | -0.0383(7)  | 0.12827(8)  | 0.0680(16)                |
| N2   | 0.2045(5)  | 0.3418(5)   | 0.09761(6)  | 0.0440(12)                |
| N3   | 0.3155(5)  | 0.5791(5)   | 0.12972(6)  | 0.0456(12)                |
| N4   | 0.4478(6)  | 0.9834(5)   | 0.15444(6)  | 0.0492(12)                |
| C1'  | 0.0574(7)  | 0.2186(7)   | 0.10724(8)  | 0.0520(17)                |
| C1D1 | 0.1162(14) | -0.0562(11) | 0.06312(12) | 0.099(4)                  |
| C1A  | 0.0308(7)  | 0.0356(6)   | 0.10817(9)  | 0.0526(14)                |
| C1B  | -0.0900(8) | -0.0780(7)  | 0.09091(10) | 0.0727(19)                |
| C1G  | -0.0134(9) | -0.0267(7)  | 0.06961(10) | 0.068(2)                  |
| C1Z  | 0.1227(10) | 0.0596(9)   | 0.02937(10) | 0.075(2)                  |
| C2'  | 0.2482(6)  | 0.6164(7)   | 0.11324(8)  | 0.0487(16)                |
| C1D2 | -0.0731(9) | 0.0512(10)  | 0.05619(11) | 0.076(3)                  |
| C2A  | 0.2370(6)  | 0.5185(6)   | 0.09338(7)  | 0.0486(16)                |

|      |             |             |             |            |
|------|-------------|-------------|-------------|------------|
| C3'  | 0.4807(6)   | 0.8702(6)   | 0.14520(8)  | 0.0471(16) |
| C1E1 | 0.1800(13)  | -0.0157(12) | 0.04381(13) | 0.095(3)   |
| C3A  | 0.3455(6)   | 0.6762(6)   | 0.14898(7)  | 0.0424(14) |
| C3B  | 0.4068(9)   | 0.5948(7)   | 0.16543(8)  | 0.0591(19) |
| C3G  | 0.3964(8)   | 0.6488(7)   | 0.18745(8)  | 0.0557(17) |
| C3Z  | 0.3687(8)   | 0.7332(8)   | 0.22792(8)  | 0.0598(17) |
| C4'  | 0.4228(7)   | 1.2374(6)   | 0.14362(8)  | 0.0491(16) |
| C1E2 | -0.0064(10) | 0.0903(10)  | 0.03588(11) | 0.082(3)   |
| C4A  | 0.5474(7)   | 1.1727(6)   | 0.15065(8)  | 0.0481(16) |
| C4B  | 0.6628(9)   | 1.2802(8)   | 0.16858(10) | 0.073(2)   |
| C2B1 | 0.0989(11)  | 0.5122(10)  | 0.07902(10) | 0.079(3)   |
| C2B2 | 0.4133(8)   | 0.6170(8)   | 0.08259(10) | 0.0673(19) |
| C3D1 | 0.2417(9)   | 0.5718(9)   | 0.19727(11) | 0.089(2)   |
| C3D2 | 0.5391(8)   | 0.7695(9)   | 0.19846(9)  | 0.0656(19) |
| C3E1 | 0.2237(10)  | 0.6117(10)  | 0.21773(10) | 0.086(2)   |
| C3E2 | 0.5241(9)   | 0.8114(9)   | 0.21868(10) | 0.071(2)   |
| C4G1 | 0.5561(13)  | 1.2553(12)  | 0.18779(11) | 0.097(3)   |
| C4G2 | 0.8068(12)  | 1.2328(13)  | 0.17285(16) | 0.111(4)   |
| O1W  | 0.8438(8)   | 1.6111(8)   | 0.12740(12) | 0.107(2)   |
| O2W  | 0.0609(9)   | 0.5269(11)  | 0.26517(9)  | 0.126(3)   |

---

Table S2 - Bond Distances (Angstrom) for peptide 1

---

|     |       |          |      |       |           |
|-----|-------|----------|------|-------|-----------|
| O1  | -C1'  | 1.210(9) | C1D1 | -C1E1 | 1.342(12) |
| O1N | -C1Z  | 1.358(9) | C1A  | -C1B  | 1.521(8)  |
| O2  | -C2'  | 1.214(8) | C1B  | -C1G  | 1.501(9)  |
| O3  | -C3'  | 1.194(7) | C1G  | -C1D2 | 1.364(11) |
| O3N | -C3Z  | 1.400(7) | C1Z  | -C1E2 | 1.360(13) |
| O4  | -C4'  | 1.249(8) | C1Z  | -C1E1 | 1.379(13) |
| O5  | -C4'  | 1.252(6) | C2'  | -C2A  | 1.522(7)  |
| O1N | -H1N  | 0.8217   | C1D2 | -C1E2 | 1.409(10) |
| O3N | -H3N  | 0.8198   | C2A  | -C2B2 | 1.518(9)  |
| O1W | -H1W2 | 0.96(3)  | C2A  | -C2B1 | 1.509(11) |
| O1W | -H1W1 | 0.96(6)  | C3'  | -C3A  | 1.537(7)  |
| O2W | -H2W1 | 0.96(18) | C3A  | -C3B  | 1.525(8)  |
| O2W | -H2W2 | 0.95(16) | C3B  | -C3G  | 1.519(8)  |
| N1  | -C1A  | 1.462(8) | C3G  | -C3D2 | 1.371(9)  |
| N2  | -C2A  | 1.461(6) | C3G  | -C3D1 | 1.340(11) |
| N2  | -C1'  | 1.356(7) | C3Z  | -C3E2 | 1.327(11) |
| N3  | -C3A  | 1.458(6) | C3Z  | -C3E1 | 1.358(10) |
| N3  | -C2'  | 1.338(7) | C4'  | -C4A  | 1.537(9)  |
| N4  | -C4A  | 1.465(6) | C4A  | -C4B  | 1.520(9)  |
| N4  | -C3'  | 1.313(7) | C4B  | -C4G2 | 1.545(15) |
| N1  | -H1B  | 0.8904   | C4B  | -C4G1 | 1.506(12) |
| N1  | -H1C  | 0.8912   | C3D1 | -C3E1 | 1.398(10) |



|      |       |           |      |       |          |
|------|-------|-----------|------|-------|----------|
| N1   | -H1A  | 0.8893    | C3D2 | -C3E2 | 1.383(9) |
| N2   | -H2   | 0.8593    | C1D1 | -H1D1 | 0.9292   |
| N3   | -H3   | 0.8600    | C1A  | -H1A1 | 0.92(7)  |
| N4   | -H4   | 0.8603    | C1B  | -H1B2 | 0.9706   |
| C1'  | -C1A  | 1.509(8)  | C1B  | -H1B1 | 0.9697   |
| C1D1 | -C1G  | 1.358(15) | C1D2 | -H1D2 | 0.9291   |
| C1E1 | -H1E1 | 0.9293    | C2B2 | -H2B5 | 0.9597   |
| C3A  | -H3A  | 0.97(6)   | C3D1 | -H3D1 | 0.9310   |
| C3B  | -H3B1 | 0.9699    | C3D2 | -H3D2 | 0.9288   |
| C3B  | -H3B2 | 0.9700    | C3E1 | -H3E1 | 0.9294   |
| C1E2 | -H1E2 | 0.9291    | C3E2 | -H3E2 | 0.9303   |
| C4A  | -H4A  | 0.9800    | C4G1 | -H4G1 | 0.9601   |
| C4B  | -H4B  | 0.9800    | C4G1 | -H4G2 | 0.9599   |
| C2B1 | -H2B1 | 0.9605    | C4G1 | -H4G3 | 0.9597   |
| C2B1 | -H2B2 | 0.9584    | C4G2 | -H4G5 | 0.9597   |
| C2B1 | -H2B3 | 0.9598    | C4G2 | -H4G6 | 0.9619   |
| C2B2 | -H2B6 | 0.9625    | C4G2 | -H4G4 | 0.9625   |
| C2B2 | -H2B4 | 0.9592    |      |       |          |

---

Table S3 - Bond Angles (Degrees) for peptide 1

---

|      |      |       |          |      |       |       |           |
|------|------|-------|----------|------|-------|-------|-----------|
| C1Z  | -O1N | -H1N  | 109.56   | C1B  | -C1G  | -C1D2 | 120.5(7)  |
| C3Z  | -O3N | -H3N  | 109.56   | C1D1 | -C1G  | -C1B  | 121.4(7)  |
| H1W1 | -O1W | -H1W2 | 105(4)   | O1N  | -C1Z  | -C1E2 | 122.5(8)  |
| H2W1 | -O2W | -H2W2 | 102(14)  | C1E1 | -C1Z  | -C1E2 | 115.4(7)  |
| C1'  | -N2  | -C2A  | 122.6(5) | O1N  | -C1Z  | -C1E1 | 122.0(9)  |
| C2'  | -N3  | -C3A  | 120.6(4) | O2   | -C2'  | -C2A  | 121.4(5)  |
| C3'  | -N4  | -C4A  | 123.6(5) | N3   | -C2'  | -C2A  | 116.4(5)  |
| H1A  | -N1  | -H1B  | 109.47   | O2   | -C2'  | -N3   | 121.8(5)  |
| H1A  | -N1  | -H1C  | 109.50   | C1G  | -C1D2 | -C1E2 | 119.8(8)  |
| C1A  | -N1  | -H1C  | 109.50   | N2   | -C2A  | -C2B1 | 110.6(5)  |
| H1B  | -N1  | -H1C  | 109.29   | N2   | -C2A  | -C2B2 | 107.1(5)  |
| C1A  | -N1  | -H1A  | 109.46   | N2   | -C2A  | -C2'  | 111.6(4)  |
| C1A  | -N1  | -H1B  | 109.60   | C2'  | -C2A  | -C2B1 | 111.3(5)  |
| C2A  | -N2  | -H2   | 118.77   | C2'  | -C2A  | -C2B2 | 107.8(4)  |
| C1'  | -N2  | -H2   | 118.64   | C2B1 | -C2A  | -C2B2 | 108.3(5)  |
| C3A  | -N3  | -H3   | 119.88   | O3   | -C3'  | -N4   | 125.2(5)  |
| C2'  | -N3  | -H3   | 119.52   | O3   | -C3'  | -C3A  | 119.4(5)  |
| C3'  | -N4  | -H4   | 118.16   | N4   | -C3'  | -C3A  | 115.4(5)  |
| C4A  | -N4  | -H4   | 118.20   | C1D1 | -C1E1 | -C1Z  | 123.5(11) |
| N2   | -C1' | -C1A  | 116.7(5) | N3   | -C3A  | -C3'  | 109.2(4)  |
| O1   | -C1' | -N2   | 123.2(5) | N3   | -C3A  | -C3B  | 108.9(4)  |
| O1   | -C1' | -C1A  | 120.1(5) | C3'  | -C3A  | -C3B  | 112.0(5)  |

|      |       |       |           |      |       |       |          |
|------|-------|-------|-----------|------|-------|-------|----------|
| C1G  | -C1D1 | -C1E1 | 121.1(10) | C3A  | -C3B  | -C3G  | 114.6(6) |
| N1   | -C1A  | -C1B  | 110.0(5)  | C3B  | -C3G  | -C3D1 | 119.4(6) |
| C1'  | -C1A  | -C1B  | 110.9(5)  | C3B  | -C3G  | -C3D2 | 123.7(6) |
| N1   | -C1A  | -C1'  | 107.4(5)  | C3D1 | -C3G  | -C3D2 | 116.9(6) |
| C1A  | -C1B  | -C1G  | 114.5(5)  | O3N  | -C3Z  | -C3E2 | 118.8(6) |
| C1D1 | -C1G  | -C1D2 | 118.2(7)  | C3E1 | -C3Z  | -C3E2 | 120.7(6) |
| O3N  | -C3Z  | -C3E1 | 120.4(7)  | C1Z  | -C1E1 | -H1E1 | 118.35   |
| O4   | -C4'  | -C4A  | 120.1(4)  | C3'  | -C3A  | -H3A  | 107(2)   |
| O5   | -C4'  | -C4A  | 115.0(6)  | N3   | -C3A  | -H3A  | 107(3)   |
| O4   | -C4'  | -O5   | 124.8(6)  | C3B  | -C3A  | -H3A  | 113(3)   |
| C1Z  | -C1E2 | -C1D2 | 121.8(8)  | C3G  | -C3B  | -H3B1 | 108.63   |
| N4   | -C4A  | -C4B  | 114.5(4)  | C3G  | -C3B  | -H3B2 | 108.68   |
| C4'  | -C4A  | -C4B  | 111.9(5)  | C3A  | -C3B  | -H3B2 | 108.60   |
| N4   | -C4A  | -C4'  | 109.8(5)  | C3A  | -C3B  | -H3B1 | 108.54   |
| C4A  | -C4B  | -C4G2 | 110.6(6)  | H3B1 | -C3B  | -H3B2 | 107.59   |
| C4G1 | -C4B  | -C4G2 | 110.5(7)  | C1D2 | -C1E2 | -H1E2 | 118.98   |
| C4A  | -C4B  | -C4G1 | 111.4(7)  | C1Z  | -C1E2 | -H1E2 | 119.18   |
| C3G  | -C3D1 | -C3E1 | 122.4(7)  | C4B  | -C4A  | -H4A  | 106.69   |
| C3G  | -C3D2 | -C3E2 | 121.7(7)  | N4   | -C4A  | -H4A  | 106.66   |
| C3Z  | -C3E1 | -C3D1 | 118.5(8)  | C4'  | -C4A  | -H4A  | 106.74   |
| C3Z  | -C3E2 | -C3D2 | 119.9(7)  | C4A  | -C4B  | -H4B  | 108.12   |
| C1G  | -C1D1 | -H1D1 | 119.43    | C4G1 | -C4B  | -H4B  | 108.09   |
| C1E1 | -C1D1 | -H1D1 | 119.44    | C4G2 | -C4B  | -H4B  | 108.11   |

|      |       |       |        |      |       |       |        |
|------|-------|-------|--------|------|-------|-------|--------|
| C1B  | -C1A  | -H1A1 | 116(3) | C2A  | -C2B1 | -H2B1 | 109.41 |
| C1'  | -C1A  | -H1A1 | 108(3) | H2B1 | -C2B1 | -H2B2 | 109.52 |
| N1   | -C1A  | -H1A1 | 104(3) | H2B1 | -C2B1 | -H2B3 | 109.44 |
| C1A  | -C1B  | -H1B1 | 108.67 | H2B2 | -C2B1 | -H2B3 | 109.62 |
| C1G  | -C1B  | -H1B2 | 108.50 | C2A  | -C2B1 | -H2B2 | 109.45 |
| C1A  | -C1B  | -H1B2 | 108.75 | C2A  | -C2B1 | -H2B3 | 109.39 |
| C1G  | -C1B  | -H1B1 | 108.68 | C2A  | -C2B2 | -H2B4 | 109.57 |
| H1B1 | -C1B  | -H1B2 | 107.57 | H2B4 | -C2B2 | -H2B5 | 109.41 |
| C1E2 | -C1D2 | -H1D2 | 119.97 | C2A  | -C2B2 | -H2B5 | 109.42 |
| C1G  | -C1D2 | -H1D2 | 120.21 | C2A  | -C2B2 | -H2B6 | 109.51 |
| C1D1 | -C1E1 | -H1E1 | 118.10 | H2B5 | -C2B2 | -H2B6 | 109.50 |
| H2B4 | -C2B2 | -H2B6 | 109.41 | H4G1 | -C4G1 | -H4G3 | 109.52 |
| C3E1 | -C3D1 | -H3D1 | 118.88 | C4B  | -C4G1 | -H4G3 | 109.46 |
| C3G  | -C3D1 | -H3D1 | 118.73 | H4G1 | -C4G1 | -H4G2 | 109.50 |
| C3G  | -C3D2 | -H3D2 | 119.27 | H4G2 | -C4G1 | -H4G3 | 109.47 |
| C3E2 | -C3D2 | -H3D2 | 119.06 | C4B  | -C4G2 | -H4G5 | 109.45 |
| C3Z  | -C3E1 | -H3E1 | 120.78 | C4B  | -C4G2 | -H4G6 | 109.44 |
| C3D1 | -C3E1 | -H3E1 | 120.72 | H4G4 | -C4G2 | -H4G6 | 109.67 |
| C3Z  | -C3E2 | -H3E2 | 120.05 | H4G5 | -C4G2 | -H4G6 | 109.39 |
| C3D2 | -C3E2 | -H3E2 | 120.05 | H4G4 | -C4G2 | -H4G5 | 109.49 |
| C4B  | -C4G1 | -H4G2 | 109.44 | C4B  | -C4G2 | -H4G4 | 109.39 |
| C4B  | -C4G1 | -H4G1 | 109.43 |      |       |       |        |

---
